# Supplementary material for: A comparative study to determine the association of gut microbiome with schizophrenia in Zhejiang, China
Source: Research Square preprint supplement (doi:10.21203/rs.3.rs-1593406/v1), 2022-05-18
Supplement: Supplementary file 1 [file 939f759bd7eb77fdc8045d66.xlsx]

## Sheet: Sheet1
Table 1. Demographic and clinical characteristics of participants.
	SZ groups (n=50)	NC groups (n=50)	t or χ2	p value
Age	39.9	37.2	1.522a	0.1311
Weight (kg)	67.2	69.6	1.347a	0.1811
Height (cm)	169.8	171.4	2.021a	0.046
BMI	23.3	23.7	0.7063a	0.4817
BMI classification [n (% BMI < 18.5)]	4 (8)	0 (0)	4.167b	0.0412
BMI classification [n (% 18.5 ≤ BMI < 24)]	27 (54)	27 (54)	0b	1
BMI classification [n (% 24 ≤ BMI < 28)]	15 (30)	23 (46)	2.716b	0.0993
BMI classification [n (% 28 ≤ BMI)]	4 (8)	0 (0)	4.167b	0.0412
Hepatitis B [n (%)]	1 (2)	0 (0)	1.010b	0.3149
Antibiotic use [n (% in past 3 months)]	0	0	-	-
Antipsychotic use	0	0	-	-
Risperidone [n (%)]	14 (28)	0 (0)	16.28b	5e-05
Clozapine [n (%)]	10 (20)	0 (0)	11.11b	0.00086
Olanzapine [n (%)]	20 (40)	0 (0)	25.00b	0
Quetiapine [n (%)]	12 (24)	0 (0)	13.64b	0.00022
Sulpiride [n (%)]	1 (2)	0 (0)	1.010b	0.3149
Aripiprazole [n (%)]	3 (6)	0 (0)	3.093b	0.0786
Perphenazine tablets [n (%)]	1 (2)	0 (0)	1.010b	0.3149
BMI = body mass index; a means Student’s t-test and b means chi-square test (χ2 value).
